# Supplementary material
Source: publisher figshare collection journal article supplement (https://springernature.figshare.com/ndownloader/files/38337020)
Supplement: Supplementary file 1 [file 38337020]

## Sheet: Euarchonta_Brillouin_TL
	Brillouin_TL	group
Anathana_ellioti	0.537288	1
Arctocebus_calabarensis	0.555417	1
Avahi_laniger	0.599576	1
Cheirogaleus_medius	0.528257	1
Cynocephalus_volans	0.537288	1
Daubentonia_madagascariensis	0.537288	1
Dendrogale_melanura	0.537288	1
Eulemur_albifrons	0.569869	1
Eulemur_collaris	0.569869	1
Eulemur_fulvus	0.569869	1
Eulemur_macaco	0.569869	1
Eulemur_mongoz	0.569869	1
Eulemur_rubriventer	0.569869	1
Eulemur_sanfordi	0.569869	1
Euoticus_elegantulus	0.537288	1
Galago_senegalensis	0.537288	1
Galeopterus_variegatus	0.537288	1
Hapalemur_griseus	0.569869	1
Indri_indri	0.599576	1
Lemur_catta	0.569869	1
Lepilemur_mustelinus	0.599576	1
Loris_tardigradus	0.562844	1
Microcebus_murinus	0.562915	1
Microcebus_rufus	0.562915	1
Nycticebus_coucang	0.53955	1
Otolemur_crassicaudatus	0.562915	1
Otolemur_garnettii	0.528257	1
Perodicticus_potto	0.510003	1
Propithecus_coquereli	0.58719	1
Propithecus_diadema	0.58719	1
Propithecus_verreauxi	0.58719	1
Ptilocercus_lowii	0.492693	1
Tarsius_syrichta	0.537288	1
Tupaia_glis	0.537288	1
Tupaia_nicobarica	0.537288	1
Tupaia_tana	0.537288	1
Urogale_everetti	0.537288	1
Varecia_variegata	0.569869	1
Alouatta_caraya	0.492693	2
Alouatta_palliata	0.492693	2
Alouatta_pigra	0.492693	2
Alouatta_seniculus	0.492693	2
Aotus_azarae	0.576153	2
Aotus_nancymaae	0.576153	2
Ateles_belzebuth	0.445898	2
Ateles_chamek	0.445898	2
Ateles_fusciceps	0.445898	2
Ateles_geoffroyi	0.445898	2
Ateles_paniscus	0.457344	2
Brachyteles_arachnoides	0.445898	2
Brachyteles_hypoxanthus	0.503099	2
Cacajao_melanocephalus	0.537288	2
Callicebus_moloch	0.537288	2
Callithrix_jacchus	0.537288	2
Cebuella_pygmaea	0.537288	2
Cebus_albifrons	0.528257	2
Cebus_capucinus	0.537288	2
Cebus_olivaceus	0.492693	2
Lagothrix_lagotricha	0.445898	2
Leontocebus_nigricollis	0.569869	2
Leontopithecus_rosalia	0.569869	2
Mico_humeralifer	0.569869	2
Pithecia_irrorata	0.537288	2
Pithecia_monachus	0.537288	2
Pithecia_pithecia	0.537288	2
Saguinus_oedipus	0.569869	2
Saimiri_sciureus	0.562915	2
Cercocebus_atys	0.569869	3
Cercopithecus_ascanius	0.569869	3
Cercopithecus_mitis	0.569869	3
Chlorocebus_aethiops	0.569869	3
Chlorocebus_cynosuros	0.569869	3
Chlorocebus_pygerythrus	0.569869	3
Chlorocebus_sabaeus	0.569869	3
Colobus_guereza	0.569869	3
Colobus_vellerosus	0.569869	3
Erythrocebus_patas	0.569869	3
Gorilla_beringei	0.395496	3
Gorilla_gorilla	0.457344	3
Homo_sapiens	0.513551	3
Hoolock_hoolock	0.503099	3
Hylobates_agilis	0.503099	3
Hylobates_klossii	0.503099	3
Hylobates_lar	0.503099	3
Hylobates_moloch	0.503099	3
Hylobates_muelleri	0.503099	3
Hylobates_pileatus	0.513551	3
Lophocebus_albigena	0.537288	3
Lophocebus_aterrimus	0.537288	3
Macaca_arctoides	0.569869	3
Macaca_fascicularis	0.569869	3
Macaca_fuscata	0.569869	3
Macaca_leonina	0.569869	3
Macaca_maura	0.569869	3
Macaca_mulatta	0.569869	3
Macaca_nemestrina	0.569869	3
Macaca_nigra	0.569869	3
Macaca_radiata	0.569869	3
Macaca_silenus	0.569869	3
Macaca_sinica	0.569869	3
Macaca_sylvanus	0.569869	3
Mandrillus_leucophaeus	0.569869	3
Mandrillus_sphinx	0.569869	3
Miopithecus_talapoin	0.537288	3
Nasalis_larvatus	0.569869	3
Nomascus_concolor	0.503099	3
Nomascus_gabriellae	0.492693	3
Nomascus_leucogenys	0.492693	3
Pan_paniscus	0.457344	3
Pan_troglodytes	0.457344	3
Papio_anubis	0.537288	3
Papio_cynocephalus	0.537288	3
Papio_hamadryas	0.537288	3
Papio_papio	0.537288	3
Pongo_abelii	0.469162	3
Pongo_pygmaeus	0.469162	3
Presbytis_melalophos	0.569869	3
Presbytis_rubicunda	0.569869	3
Rhinopithecus_bieti	0.569869	3
Rhinopithecus_roxellana	0.569869	3
Semnopithecus_entellus	0.569869	3
Semnopithecus_schistaceus	0.569869	3
Symphalangus_syndactylus	0.503099	3
Theropithecus_gelada	0.537288	3
Trachypithecus_cristatus	0.569869	3
Trachypithecus_phayrei	0.569869	3

## Sheet: Euarchonta_evenness_TL
	evenness_TL	group
Anathana_ellioti	0.892845	1
Arctocebus_calabarensis	0.913127	1
Avahi_laniger	0.985726	1
Cheirogaleus_medius	0.871223	1
Cynocephalus_volans	0.892845	1
Daubentonia_madagascariensis	0.892845	1
Dendrogale_melanura	0.892845	1
Eulemur_albifrons	0.946987	1
Eulemur_collaris	0.946987	1
Eulemur_fulvus	0.946987	1
Eulemur_macaco	0.946987	1
Eulemur_mongoz	0.946987	1
Eulemur_rubriventer	0.946987	1
Eulemur_sanfordi	0.946987	1
Euoticus_elegantulus	0.892845	1
Galago_senegalensis	0.892845	1
Galeopterus_variegatus	0.892845	1
Hapalemur_griseus	0.946987	1
Indri_indri	0.985726	1
Lemur_catta	0.946987	1
Lepilemur_mustelinus	0.985726	1
Loris_tardigradus	0.912086	1
Microcebus_murinus	0.928382	1
Microcebus_rufus	0.928382	1
Nycticebus_coucang	0.879048	1
Otolemur_crassicaudatus	0.928382	1
Otolemur_garnettii	0.871223	1
Perodicticus_potto	0.83318	1
Propithecus_coquereli	0.968418	1
Propithecus_diadema	0.968418	1
Propithecus_verreauxi	0.968418	1
Ptilocercus_lowii	0.818739	1
Tarsius_syrichta	0.892845	1
Tupaia_glis	0.892845	1
Tupaia_nicobarica	0.892845	1
Tupaia_tana	0.892845	1
Urogale_everetti	0.892845	1
Varecia_variegata	0.946987	1
Alouatta_caraya	0.818739	2
Alouatta_palliata	0.818739	2
Alouatta_pigra	0.818739	2
Alouatta_seniculus	0.818739	2
Aotus_azarae	0.941246	2
Aotus_nancymaae	0.941246	2
Ateles_belzebuth	0.743729	2
Ateles_chamek	0.743729	2
Ateles_fusciceps	0.743729	2
Ateles_geoffroyi	0.743729	2
Ateles_paniscus	0.769891	2
Brachyteles_arachnoides	0.743729	2
Brachyteles_hypoxanthus	0.839137	2
Cacajao_melanocephalus	0.892845	2
Callicebus_moloch	0.892845	2
Callithrix_jacchus	0.892845	2
Cebuella_pygmaea	0.892845	2
Cebus_albifrons	0.871223	2
Cebus_capucinus	0.892845	2
Cebus_olivaceus	0.818739	2
Lagothrix_lagotricha	0.743729	2
Leontocebus_nigricollis	0.946987	2
Leontopithecus_rosalia	0.946987	2
Mico_humeralifer	0.946987	2
Pithecia_irrorata	0.892845	2
Pithecia_monachus	0.892845	2
Pithecia_pithecia	0.892845	2
Saguinus_oedipus	0.946987	2
Saimiri_sciureus	0.928382	2
Cercocebus_atys	0.946987	3
Cercopithecus_ascanius	0.946987	3
Cercopithecus_mitis	0.946987	3
Chlorocebus_aethiops	0.946987	3
Chlorocebus_cynosuros	0.946987	3
Chlorocebus_pygerythrus	0.946987	3
Chlorocebus_sabaeus	0.946987	3
Colobus_guereza	0.946987	3
Colobus_vellerosus	0.946987	3
Erythrocebus_patas	0.946987	3
Gorilla_beringei	0.668728	3
Gorilla_gorilla	0.769891	3
Homo_sapiens	0.864509	3
Hoolock_hoolock	0.839137	3
Hylobates_agilis	0.839137	3
Hylobates_klossii	0.839137	3
Hylobates_lar	0.839137	3
Hylobates_moloch	0.839137	3
Hylobates_muelleri	0.839137	3
Hylobates_pileatus	0.864509	3
Lophocebus_albigena	0.892845	3
Lophocebus_aterrimus	0.892845	3
Macaca_arctoides	0.946987	3
Macaca_fascicularis	0.946987	3
Macaca_fuscata	0.946987	3
Macaca_leonina	0.946987	3
Macaca_maura	0.946987	3
Macaca_mulatta	0.946987	3
Macaca_nemestrina	0.946987	3
Macaca_nigra	0.946987	3
Macaca_radiata	0.946987	3
Macaca_silenus	0.946987	3
Macaca_sinica	0.946987	3
Macaca_sylvanus	0.946987	3
Mandrillus_leucophaeus	0.946987	3
Mandrillus_sphinx	0.946987	3
Miopithecus_talapoin	0.892845	3
Nasalis_larvatus	0.946987	3
Nomascus_concolor	0.839137	3
Nomascus_gabriellae	0.818739	3
Nomascus_leucogenys	0.818739	3
Pan_paniscus	0.769891	3
Pan_troglodytes	0.769891	3
Papio_anubis	0.892845	3
Papio_cynocephalus	0.892845	3
Papio_hamadryas	0.892845	3
Papio_papio	0.892845	3
Pongo_abelii	0.793286	3
Pongo_pygmaeus	0.793286	3
Presbytis_melalophos	0.946987	3
Presbytis_rubicunda	0.946987	3
Rhinopithecus_bieti	0.946987	3
Rhinopithecus_roxellana	0.946987	3
Semnopithecus_entellus	0.946987	3
Semnopithecus_schistaceus	0.946987	3
Symphalangus_syndactylus	0.839137	3
Theropithecus_gelada	0.892845	3
Trachypithecus_cristatus	0.946987	3
Trachypithecus_phayrei	0.946987	3

## Sheet: Carnivora_Brillouin_TL
	Brillouin_TL	group
Acinonyx_jubatus	0.562915	1
Arctictis_binturong	0.562915	1
Bdeogale_crassicauda	0.528257	1
Caracal_caracal	0.562915	1
Civettictis_civetta	0.528257	1
Crocuta_crocuta	0.482443	1
Crossarchus_obscurus	0.528257	1
Cryptoprocta_ferox	0.562915	1
Cynictis_penicillata	0.562915	1
Cynogale_bennettii	0.528257	1
Eupleres_goudotii	0.562915	1
Felis_catus	0.562915	1
Felis_silvestris	0.562915	1
Galidia_elegans	0.562915	1
Galidictis_fasciata	0.528257	1
Genetta_genetta	0.562915	1
Genetta_maculata	0.562915	1
Genetta_servalina	0.562915	1
Genetta_tigrina	0.562915	1
Helogale_parvula	0.562915	1
Hemigalus_derbyanus	0.562915	1
Herpestes_edwardsii	0.562915	1
Herpestes_ichneumon	0.562915	1
Herpestes_javanicus	0.562915	1
Herpestes_vitticollis	0.562915	1
Hyaena_brunnea	0.424285	1
Hyaena_hyaena	0.434872	1
Ichneumia_albicauda	0.562915	1
Leopardus_pardalis	0.562915	1
Leopardus_tigrinus	0.562915	1
Leopardus_wiedii	0.562915	1
Leptailurus_serval	0.562915	1
Liberiictis_kuhni	0.562915	1
Lynx_canadensis	0.562915	1
Lynx_lynx	0.562915	1
Lynx_rufus	0.562915	1
Macrogalidia_musschenbroekii	0.569869	1
Mungos_mungo	0.528257	1
Nandinia_binotata	0.562915	1
Neofelis_nebulosa	0.562915	1
Panthera_leo	0.562915	1
Panthera_onca	0.562915	1
Panthera_pardus	0.562915	1
Panthera_tigris	0.562915	1
Panthera_uncia	0.562915	1
Paradoxurus_hermaphroditus	0.562915	1
Prionailurus_bengalensis	0.562915	1
Prionodon_linsang	0.569869	1
Prionodon_pardicolor	0.569869	1
Proteles_cristata	0.482443	1
Puma_concolor	0.562915	1
Salanoia_concolor	0.562915	1
Suricata_suricatta	0.528257	1
Viverra_tangalunga	0.562915	1
Viverra_zibetha	0.562915	1
Viverricula_indica	0.562915	1
Ailuropoda_melanoleuca	0.503099	2
Ailurus_fulgens	0.528257	2
Aonyx_capensis	0.528257	2
Aonyx_cinerea	0.528257	2
Arctocephalus_australis	0.482443	2
Arctocephalus_forsteri	0.482443	2
Arctocephalus_pusillus	0.482443	2
Arctocephalus_tropicalis	0.482443	2
Arctonyx_collaris	0.424285	2
Bassaricyon_alleni	0.562915	2
Bassariscus_astutus	0.562915	2
Callorhinus_ursinus	0.482443	2
Canis_adustus	0.562915	2
Canis_aureus	0.562915	2
Canis_latrans	0.562915	2
Canis_lupus	0.562915	2
Canis_mesomelas	0.562915	2
Canis_simensis	0.562915	2
Cerdocyon_thous	0.562915	2
Chrysocyon_brachyurus	0.562915	2
Conepatus_chinga	0.472418	2
Conepatus_humboldtii	0.472418	2
Cuon_alpinus	0.562915	2
Cystophora_cristata	0.482443	2
Eira_barbara	0.528257	2
Enhydra_lutris	0.519125	2
Erignathus_barbatus	0.482443	2
Eumetopias_jubatus	0.482443	2
Galictis_cuja	0.482443	2
Galictis_vittata	0.472418	2
Gulo_gulo	0.482443	2
Halichoerus_grypus	0.482443	2
Helarctos_malayanus	0.434872	2
Hydrurga_leptonyx	0.528257	2
Ictonyx_libyca	0.482443	2
Leptonychotes_weddellii	0.482443	2
Lobodon_carcinophaga	0.482443	2
Lontra_canadensis	0.528257	2
Lontra_longicaudis	0.482443	2
Lontra_provocax	0.482443	2
Lutra_lutra	0.528257	2
Lutra_maculicollis	0.528257	2
Lutrogale_perspicillata	0.528257	2
Lycaon_pictus	0.562915	2
Lyncodon_patagonicus	0.424285	2
Martes_americana	0.528257	2
Martes_flavigula	0.528257	2
Martes_foina	0.528257	2
Martes_martes	0.528257	2
Martes_pennanti	0.528257	2
Martes_zibellina	0.528257	2
Meles_anakuma	0.482443	2
Meles_meles	0.482443	2
Mellivora_capensis	0.434872	2
Melogale_orientalis	0.528257	2
Melursus_ursinus	0.482443	2
Mephitis_mephitis	0.510003	2
Mirounga_angustirostris	0.482443	2
Mirounga_leonina	0.482443	2
Monachus_monachus	0.482443	2
Mustela_erminea	0.528257	2
Mustela_felipei	0.528257	2
Mustela_frenata	0.528257	2
Mustela_lutreolina	0.528257	2
Mustela_nigripes	0.528257	2
Mustela_nivalis	0.528257	2
Mustela_putorius	0.528257	2
Mustela_sibirica	0.528257	2
Mydaus_javanensis	0.528257	2
Nasua_narica	0.482443	2
Nasua_nasua	0.528257	2
Neomonachus_tropicalis	0.482443	2
Neophoca_cinerea	0.482443	2
Neovison_vison	0.528257	2
Nyctereutes_procyonoides	0.562915	2
Odobenus_rosmarus	0.482443	2
Ommatophoca_rossii	0.482443	2
Otaria_bryonia	0.482443	2
Otocyon_megalotis	0.562915	2
Pagophilus_groenlandicus	0.482443	2
Phoca_vitulina	0.482443	2
Potos_flavus	0.528257	2
Procyon_cancrivorus	0.528257	2
Procyon_lotor	0.528257	2
Pseudalopex_gymnocercus	0.562915	2
Pteronura_brasiliensis	0.482443	2
Pusa_hispida	0.482443	2
Speothos_venaticus	0.562915	2
Spilogale_gracilis	0.555417	2
Taxidea_taxus	0.528257	2
Urocyon_cinereoargenteus	0.562915	2
Ursus_americanus	0.528257	2
Ursus_arctos	0.434872	2
Ursus_maritimus	0.528257	2
Ursus_thibetanus	0.528257	2
Vulpes_lagopus	0.562915	2
Vulpes_vulpes	0.562915	2
Vulpes_zerda	0.562915	2
Zalophus_californianus	0.482443	2
Zalophus_japonicus	0.482443	2

## Sheet: Carnivora_evenness_TL
	evenness_TL	group
Acinonyx_jubatus	0.928382	1
Arctictis_binturong	0.928382	1
Bdeogale_crassicauda	0.871223	1
Caracal_caracal	0.928382	1
Civettictis_civetta	0.871223	1
Crocuta_crocuta	0.795664	1
Crossarchus_obscurus	0.871223	1
Cryptoprocta_ferox	0.928382	1
Cynictis_penicillata	0.928382	1
Cynogale_bennettii	0.871223	1
Eupleres_goudotii	0.928382	1
Felis_catus	0.928382	1
Felis_silvestris	0.928382	1
Galidia_elegans	0.928382	1
Galidictis_fasciata	0.871223	1
Genetta_genetta	0.928382	1
Genetta_maculata	0.928382	1
Genetta_servalina	0.928382	1
Genetta_tigrina	0.928382	1
Helogale_parvula	0.928382	1
Hemigalus_derbyanus	0.928382	1
Herpestes_edwardsii	0.928382	1
Herpestes_ichneumon	0.928382	1
Herpestes_javanicus	0.928382	1
Herpestes_vitticollis	0.928382	1
Hyaena_brunnea	0.699748	1
Hyaena_hyaena	0.722653	1
Ichneumia_albicauda	0.928382	1
Leopardus_pardalis	0.928382	1
Leopardus_tigrinus	0.928382	1
Leopardus_wiedii	0.928382	1
Leptailurus_serval	0.928382	1
Liberiictis_kuhni	0.928382	1
Lynx_canadensis	0.928382	1
Lynx_lynx	0.928382	1
Lynx_rufus	0.928382	1
Macrogalidia_musschenbroekii	0.946987	1
Mungos_mungo	0.871223	1
Nandinia_binotata	0.928382	1
Neofelis_nebulosa	0.928382	1
Panthera_leo	0.928382	1
Panthera_onca	0.928382	1
Panthera_pardus	0.928382	1
Panthera_tigris	0.928382	1
Panthera_uncia	0.928382	1
Paradoxurus_hermaphroditus	0.928382	1
Prionailurus_bengalensis	0.928382	1
Prionodon_linsang	0.946987	1
Prionodon_pardicolor	0.946987	1
Proteles_cristata	0.795664	1
Puma_concolor	0.928382	1
Salanoia_concolor	0.928382	1
Suricata_suricatta	0.871223	1
Viverra_tangalunga	0.928382	1
Viverra_zibetha	0.928382	1
Viverricula_indica	0.928382	1
Ailuropoda_melanoleuca	0.839137	2
Ailurus_fulgens	0.871223	2
Aonyx_capensis	0.871223	2
Aonyx_cinerea	0.871223	2
Arctocephalus_australis	0.795664	2
Arctocephalus_forsteri	0.795664	2
Arctocephalus_pusillus	0.795664	2
Arctocephalus_tropicalis	0.795664	2
Arctonyx_collaris	0.699748	2
Bassaricyon_alleni	0.928382	2
Bassariscus_astutus	0.928382	2
Callorhinus_ursinus	0.795664	2
Canis_adustus	0.928382	2
Canis_aureus	0.928382	2
Canis_latrans	0.928382	2
Canis_lupus	0.928382	2
Canis_mesomelas	0.928382	2
Canis_simensis	0.928382	2
Cerdocyon_thous	0.928382	2
Chrysocyon_brachyurus	0.928382	2
Conepatus_chinga	0.776674	2
Conepatus_humboldtii	0.776674	2
Cuon_alpinus	0.928382	2
Cystophora_cristata	0.795664	2
Eira_barbara	0.871223	2
Enhydra_lutris	0.853461	2
Erignathus_barbatus	0.795664	2
Eumetopias_jubatus	0.795664	2
Galictis_cuja	0.795664	2
Galictis_vittata	0.776674	2
Gulo_gulo	0.795664	2
Halichoerus_grypus	0.795664	2
Helarctos_malayanus	0.722653	2
Hydrurga_leptonyx	0.871223	2
Ictonyx_libyca	0.795664	2
Leptonychotes_weddellii	0.795664	2
Lobodon_carcinophaga	0.795664	2
Lontra_canadensis	0.871223	2
Lontra_longicaudis	0.795664	2
Lontra_provocax	0.795664	2
Lutra_lutra	0.871223	2
Lutra_maculicollis	0.871223	2
Lutrogale_perspicillata	0.871223	2
Lycaon_pictus	0.928382	2
Lyncodon_patagonicus	0.699748	2
Martes_americana	0.871223	2
Martes_flavigula	0.871223	2
Martes_foina	0.871223	2
Martes_martes	0.871223	2
Martes_pennanti	0.871223	2
Martes_zibellina	0.871223	2
Meles_anakuma	0.795664	2
Meles_meles	0.795664	2
Mellivora_capensis	0.722653	2
Melogale_orientalis	0.871223	2
Melursus_ursinus	0.795664	2
Mephitis_mephitis	0.83318	2
Mirounga_angustirostris	0.795664	2
Mirounga_leonina	0.795664	2
Monachus_monachus	0.795664	2
Mustela_erminea	0.871223	2
Mustela_felipei	0.871223	2
Mustela_frenata	0.871223	2
Mustela_lutreolina	0.871223	2
Mustela_nigripes	0.871223	2
Mustela_nivalis	0.871223	2
Mustela_putorius	0.871223	2
Mustela_sibirica	0.871223	2
Mydaus_javanensis	0.871223	2
Nasua_narica	0.795664	2
Nasua_nasua	0.871223	2
Neomonachus_tropicalis	0.795664	2
Neophoca_cinerea	0.795664	2
Neovison_vison	0.871223	2
Nyctereutes_procyonoides	0.928382	2
Odobenus_rosmarus	0.795664	2
Ommatophoca_rossii	0.795664	2
Otaria_bryonia	0.795664	2
Otocyon_megalotis	0.928382	2
Pagophilus_groenlandicus	0.795664	2
Phoca_vitulina	0.795664	2
Potos_flavus	0.871223	2
Procyon_cancrivorus	0.871223	2
Procyon_lotor	0.871223	2
Pseudalopex_gymnocercus	0.928382	2
Pteronura_brasiliensis	0.795664	2
Pusa_hispida	0.795664	2
Speothos_venaticus	0.928382	2
Spilogale_gracilis	0.913127	2
Taxidea_taxus	0.871223	2
Urocyon_cinereoargenteus	0.928382	2
Ursus_americanus	0.871223	2
Ursus_arctos	0.722653	2
Ursus_maritimus	0.871223	2
Ursus_thibetanus	0.871223	2
Vulpes_lagopus	0.928382	2
Vulpes_vulpes	0.928382	2
Vulpes_zerda	0.928382	2
Zalophus_californianus	0.795664	2
Zalophus_japonicus	0.795664	2

## Sheet: Cetartiodactyla_Brillouin_TL
	Brillouin_TL	group
Vicugna_pacos	0.569869	1
Vicugna_vicugna	0.569869	1
Lama_glama	0.569869	1
Camelus_dromedarius	0.554324	1
Camelus_ferus	0.569869	1
Tayassu_pecari	0.528257	1
Pecari_tajacu	0.492693	1
Sus_scrofa	0.537288	1
Sus_barbatus	0.457344	1
Potamochoerus_porcus	0.492693	1
Phacochoerus_africanus	0.537288	1
Phacochoerus_aethiopicus	0.503099	1
Hylochoerus_meinertzhageni	0.492693	1
Babyrousa_babyrussa	0.537288	1
Hippopotamus_amphibius	0.434872	1
Choeropsis_liberiensis	0.434872	1
Moschiola_meminna	0.537288	1
Moschiola_indica	0.537288	1
Tragulus_javanicus	0.537288	1
Tragulus_kanchil	0.537288	1
Tragulus_napu	0.537288	1
Okapia_johnstoni	0.492693	1
Giraffa_camelopardalis	0.492693	1
Antilocapra_americana	0.537288	1
Muntiacus_muntjak	0.537288	1
Dama_dama	0.537288	1
Elaphurus_davidianus	0.537288	1
Rusa_unicolor	0.537288	1
Cervus_elaphus	0.537288	1
Axis_calamianensis	0.537288	1
Axis_axis	0.537288	1
Rangifer_tarandus	0.492693	1
Odocoileus_virginianus	0.537288	1
Odocoileus_hemionus	0.537288	1
Mazama_gouazoubira	0.537288	1
Blastocerus_dichotomus	0.546054	1
Pudu_puda	0.537288	1
Hydropotes_inermis	0.546054	1
Capreolus_capreolus	0.537288	1
Alces_alces	0.537288	1
Moschus_moschiferus	0.492693	1
Moschus_berezovskii	0.537288	1
Boselaphus_tragocamelus	0.537288	1
Tetracerus_quadricornis	0.537288	1
Tragelaphus_imberbis	0.537288	1
Tragelaphus_angasii	0.537288	1
Tragelaphus_scriptus	0.537288	1
Tragelaphus_eurycerus	0.537288	1
Tragelaphus_spekii	0.537288	1
Tragelaphus_buxtoni	0.537288	1
Tragelaphus_strepsiceros	0.537288	1
Syncerus_caffer	0.537288	1
Bubalus_mindorensis	0.537288	1
Bubalus_depressicornis	0.562915	1
Bubalus_arnee	0.537288	1
Bos_gaurus	0.537288	1
Bos_taurus	0.537288	1
Bos_indicus	0.537288	1
Bison_bonasus	0.492693	1
Bos_mutus	0.492693	1
Bos_grunniens	0.492693	1
Bison_bison	0.492693	1
Nesotragus_moschatus	0.537288	1
Aepyceros_melampus	0.537288	1
Pelea_capreolus	0.537288	1
Redunca_fulvorufula	0.537288	1
Redunca_redunca	0.537288	1
Redunca_arundinum	0.537288	1
Kobus_megaceros	0.537288	1
Kobus_leche	0.537288	1
Kobus_vardonii	0.537288	1
Kobus_kob	0.537288	1
Kobus_ellipsiprymnus	0.537288	1
Ourebia_ourebi	0.537288	1
Raphicerus_melanotis	0.537288	1
Raphicerus_sharpei	0.537288	1
Raphicerus_campestris	0.537288	1
Madoqua_kirkii	0.537288	1
Madoqua_guentheri	0.537288	1
Saiga_tatarica	0.569869	1
Nanger_granti	0.537288	1
Eudorcas_rufifrons	0.537288	1
Gazella_dorcas	0.537288	1
Gazella_gazella	0.537288	1
Gazella_spekei	0.537288	1
Antilope_cervicapra	0.537288	1
Litocranius_walleri	0.537288	1
Antidorcas_marsupialis	0.537288	1
Neotragus_pygmaeus	0.547579	1
Oreotragus_oreotragus	0.537288	1
Philantomba_monticola	0.492693	1
Sylvicapra_grimmia	0.492693	1
Cephalophus_silvicultor	0.492693	1
Cephalophus_dorsalis	0.492693	1
Cephalophus_leucogaster	0.492693	1
Cephalophus_nigrifrons	0.492693	1
Cephalophus_natalensis	0.492693	1
Cephalophus_weynsi	0.492693	1
Ovibos_moschatus	0.537288	1
Capricornis_crispus	0.537288	1
Ovis_canadensis	0.537288	1
Ovis_orientalis	0.537288	1
Ovis_aries	0.562915	1
Ovis_ammon	0.537288	1
Capra_ibex	0.537288	1
Capra_hircus	0.537288	1
Pseudois_nayaur	0.537288	1
Myotragus_balearicus	0.546054	1
Oreamnos_americanus	0.537288	1
Rupicapra_rupicapra	0.537288	1
Ammotragus_lervia	0.537288	1
Connochaetes_taurinus	0.537288	1
Connochaetes_gnou	0.528257	1
Damaliscus_pygargus	0.537288	1
Damaliscus_lunatus	0.537288	1
Beatragus_hunteri	0.537288	1
Alcelaphus_buselaphus	0.537288	1
Hippotragus_niger	0.537288	1
Hippotragus_equinus	0.528257	1
Oryx_dammah	0.537288	1
Oryx_leucoryx	0.537288	1
Oryx_gazella	0.537288	1
Oryx_beisa	0.537288	1
Indopacetus_pacificus	0.57975	2
Kogia_sima	0.606526	2
Kogia_breviceps	0.599576	2
Physeter_macrocephalus	0.591209	2
Platanista_gangetica	0.593691	2
Pontoporia_blainvillei	0.561762	2
Inia_geoffrensis	0.395496	2
Inia_araguaiaensis	0.421225	2
Lipotes_vexillifer	0.580912	2
Delphinapterus_leucas	0.601574	2
Mesoplodon_bowdoini	0.60634	2
Monodon_monoceros	0.601574	2
Neophocaena_phocaenoides	0.613761	2
Phocoenoides_dalli	0.625314	2
Phocoena_phocoena	0.622746	2
Phocoena_spinipinnis	0.626433	2
Phocoena_dioptrica	0.625261	2
Lagenorhynchus_acutus	0.627696	2
Lagenorhynchus_albirostris	0.617428	2
Orcinus_orca	0.599576	2
Orcaella_brevirostris	0.622746	2
Grampus_griseus	0.620033	2
Pseudorca_crassidens	0.60634	2
Peponocephala_electra	0.626433	2
Globicephala_melas	0.612403	2
Globicephala_macrorhynchus	0.613789	2
Feresa_attenuata	0.615381	2
Steno_bredanensis	0.617446	2
Sotalia_guianensis	0.617096	2
Sotalia_fluviatilis	0.617096	2
Tursiops_truncatus	0.622746	2
Stenella_attenuata	0.623341	2
Lagenodelphis_hosei	0.608992	2
Stenella_longirostris	0.627696	2
Sousa_chinensis	0.599576	2
Tursiops_aduncus	0.622746	2
Stenella_frontalis	0.626505	2
Stenella_coeruleoalba	0.627696	2
Stenella_clymene	0.6298	2
Delphinus_delphis	0.616138	2
Delphinus_capensis	0.619235	2
Lagenorhynchus_obscurus	0.603224	2
Lagenorhynchus_obliquidens	0.612703	2
Lagenorhynchus_cruciger	0.603224	2
Lagenorhynchus_australis	0.622746	2
Cephalorhynchus_hectori	0.612578	2
Cephalorhynchus_heavisidii	0.61456	2
Cephalorhynchus_eutropia	0.621828	2
Cephalorhynchus_commersonii	0.622797	2
Berardius_bairdii	0.613761	2
Berardius_arnuxii	0.608162	2
Mesoplodon_bidens	0.60634	2
Ziphius_cavirostris	0.60634	2
Mesoplodon_stejnegeri	0.601574	2
Hyperoodon_planifrons	0.601771	2
Hyperoodon_ampullatus	0.601771	2
Mesoplodon_hectori	0.608258	2
Mesoplodon_carlhubbsi	0.608258	2
Mesoplodon_layardii	0.60634	2
Mesoplodon_mirus	0.60634	2
Mesoplodon_europaeus	0.60634	2
Mesoplodon_densirostris	0.60634	2
Mesoplodon_grayi	0.608258	2
Tasmacetus_shepherdi	0.60634	2
Eubalaena_glacialis	0.618587	2
Eubalaena_japonica	0.612403	2
Balaenoptera_physalus	0.626433	2
Balaenoptera_musculus	0.626505	2
Balaenoptera_omurai	0.618569	2
Balaenoptera_borealis	0.622746	2
Balaenoptera_edeni	0.621437	2
Mesoplodon_perrini	0.608258	2
Balaenoptera_bonaerensis	0.613789	2
Mesoplodon_peruvianus	0.60634	2
Lissodelphis_peronii	0.569639	2
Lissodelphis_borealis	0.577504	2
Balaena_mysticetus	0.608162	2
Caperea_marginata	0.351939	2
Balaenoptera_acutorostrata	0.613789	2
Mesoplodon_ginkgodens	0.608258	2
Megaptera_novaeangliae	0.612403	2
Eschrichtius_robustus	0.618587	2

## Sheet: Cetartiodactyla_evenness_TL
	evenness_TL	group
Vicugna_pacos	0.946987	1
Vicugna_vicugna	0.946987	1
Lama_glama	0.946987	1
Camelus_dromedarius	0.933147	1
Camelus_ferus	0.946987	1
Tayassu_pecari	0.871223	1
Pecari_tajacu	0.818739	1
Sus_scrofa	0.892845	1
Sus_barbatus	0.769891	1
Potamochoerus_porcus	0.818739	1
Phacochoerus_africanus	0.892845	1
Phacochoerus_aethiopicus	0.839137	1
Hylochoerus_meinertzhageni	0.818739	1
Babyrousa_babyrussa	0.892845	1
Hippopotamus_amphibius	0.722653	1
Choeropsis_liberiensis	0.722653	1
Moschiola_meminna	0.892845	1
Moschiola_indica	0.892845	1
Tragulus_javanicus	0.892845	1
Tragulus_kanchil	0.892845	1
Tragulus_napu	0.892845	1
Okapia_johnstoni	0.818739	1
Giraffa_camelopardalis	0.818739	1
Antilocapra_americana	0.892845	1
Muntiacus_muntjak	0.892845	1
Dama_dama	0.892845	1
Elaphurus_davidianus	0.892845	1
Rusa_unicolor	0.892845	1
Cervus_elaphus	0.892845	1
Axis_calamianensis	0.892845	1
Axis_axis	0.892845	1
Rangifer_tarandus	0.818739	1
Odocoileus_virginianus	0.892845	1
Odocoileus_hemionus	0.892845	1
Mazama_gouazoubira	0.892845	1
Blastocerus_dichotomus	0.910783	1
Pudu_puda	0.892845	1
Hydropotes_inermis	0.910783	1
Capreolus_capreolus	0.892845	1
Alces_alces	0.892845	1
Moschus_moschiferus	0.818739	1
Moschus_berezovskii	0.892845	1
Boselaphus_tragocamelus	0.892845	1
Tetracerus_quadricornis	0.892845	1
Tragelaphus_imberbis	0.892845	1
Tragelaphus_angasii	0.892845	1
Tragelaphus_scriptus	0.892845	1
Tragelaphus_eurycerus	0.892845	1
Tragelaphus_spekii	0.892845	1
Tragelaphus_buxtoni	0.892845	1
Tragelaphus_strepsiceros	0.892845	1
Syncerus_caffer	0.892845	1
Bubalus_mindorensis	0.892845	1
Bubalus_depressicornis	0.928382	1
Bubalus_arnee	0.892845	1
Bos_gaurus	0.892845	1
Bos_taurus	0.892845	1
Bos_indicus	0.892845	1
Bison_bonasus	0.818739	1
Bos_mutus	0.818739	1
Bos_grunniens	0.818739	1
Bison_bison	0.818739	1
Nesotragus_moschatus	0.892845	1
Aepyceros_melampus	0.892845	1
Pelea_capreolus	0.892845	1
Redunca_fulvorufula	0.892845	1
Redunca_redunca	0.892845	1
Redunca_arundinum	0.892845	1
Kobus_megaceros	0.892845	1
Kobus_leche	0.892845	1
Kobus_vardonii	0.892845	1
Kobus_kob	0.892845	1
Kobus_ellipsiprymnus	0.892845	1
Ourebia_ourebi	0.892845	1
Raphicerus_melanotis	0.892845	1
Raphicerus_sharpei	0.892845	1
Raphicerus_campestris	0.892845	1
Madoqua_kirkii	0.892845	1
Madoqua_guentheri	0.892845	1
Saiga_tatarica	0.946987	1
Nanger_granti	0.892845	1
Eudorcas_rufifrons	0.892845	1
Gazella_dorcas	0.892845	1
Gazella_gazella	0.892845	1
Gazella_spekei	0.892845	1
Antilope_cervicapra	0.892845	1
Litocranius_walleri	0.892845	1
Antidorcas_marsupialis	0.892845	1
Neotragus_pygmaeus	0.894567	1
Oreotragus_oreotragus	0.892845	1
Philantomba_monticola	0.818739	1
Sylvicapra_grimmia	0.818739	1
Cephalophus_silvicultor	0.818739	1
Cephalophus_dorsalis	0.818739	1
Cephalophus_leucogaster	0.818739	1
Cephalophus_nigrifrons	0.818739	1
Cephalophus_natalensis	0.818739	1
Cephalophus_weynsi	0.818739	1
Ovibos_moschatus	0.892845	1
Capricornis_crispus	0.892845	1
Ovis_canadensis	0.892845	1
Ovis_orientalis	0.892845	1
Ovis_aries	0.928382	1
Ovis_ammon	0.892845	1
Capra_ibex	0.892845	1
Capra_hircus	0.892845	1
Pseudois_nayaur	0.892845	1
Myotragus_balearicus	0.910783	1
Oreamnos_americanus	0.892845	1
Rupicapra_rupicapra	0.892845	1
Ammotragus_lervia	0.892845	1
Connochaetes_taurinus	0.892845	1
Connochaetes_gnou	0.871223	1
Damaliscus_pygargus	0.892845	1
Damaliscus_lunatus	0.892845	1
Beatragus_hunteri	0.892845	1
Alcelaphus_buselaphus	0.892845	1
Hippotragus_niger	0.892845	1
Hippotragus_equinus	0.871223	1
Oryx_dammah	0.892845	1
Oryx_leucoryx	0.892845	1
Oryx_gazella	0.892845	1
Oryx_beisa	0.892845	1
Indopacetus_pacificus	0.925478	2
Kogia_sima	0.988167	2
Kogia_breviceps	0.985726	2
Physeter_macrocephalus	0.982449	2
Platanista_gangetica	0.990237	2
Pontoporia_blainvillei	0.94986	2
Inia_geoffrensis	0.668728	2
Inia_araguaiaensis	0.724386	2
Lipotes_vexillifer	0.977904	2
Delphinapterus_leucas	0.99214	2
Mesoplodon_bowdoini	1	2
Monodon_monoceros	0.99214	2
Neophocaena_phocaenoides	0.994595	2
Phocoenoides_dalli	0.972293	2
Phocoena_phocoena	1	2
Phocoena_spinipinnis	1	2
Phocoena_dioptrica	1	2
Lagenorhynchus_acutus	0.989383	2
Lagenorhynchus_albirostris	0.965985	2
Orcinus_orca	0.985726	2
Orcaella_brevirostris	1	2
Grampus_griseus	0.986283	2
Pseudorca_crassidens	1	2
Peponocephala_electra	1	2
Globicephala_melas	0.990032	2
Globicephala_macrorhynchus	1	2
Feresa_attenuata	0.984199	2
Steno_bredanensis	0.991489	2
Sotalia_guianensis	1	2
Sotalia_fluviatilis	1	2
Tursiops_truncatus	1	2
Stenella_attenuata	0.978694	2
Lagenodelphis_hosei	0.954967	2
Stenella_longirostris	0.989383	2
Sousa_chinensis	0.985726	2
Tursiops_aduncus	1	2
Stenella_frontalis	0.996578	2
Stenella_coeruleoalba	0.989383	2
Stenella_clymene	0.997001	2
Delphinus_delphis	0.96983	2
Delphinus_capensis	0.976047	2
Lagenorhynchus_obscurus	0.949503	2
Lagenorhynchus_obliquidens	0.96199	2
Lagenorhynchus_cruciger	0.949503	2
Lagenorhynchus_australis	1	2
Cephalorhynchus_hectori	0.977883	2
Cephalorhynchus_heavisidii	0.972874	2
Cephalorhynchus_eutropia	0.99265	2
Cephalorhynchus_commersonii	0.996059	2
Berardius_bairdii	0.994595	2
Berardius_arnuxii	0.993539	2
Mesoplodon_bidens	1	2
Ziphius_cavirostris	1	2
Mesoplodon_stejnegeri	0.99214	2
Hyperoodon_planifrons	1	2
Hyperoodon_ampullatus	1	2
Mesoplodon_hectori	1	2
Mesoplodon_carlhubbsi	1	2
Mesoplodon_layardii	1	2
Mesoplodon_mirus	1	2
Mesoplodon_europaeus	1	2
Mesoplodon_densirostris	1	2
Mesoplodon_grayi	1	2
Tasmacetus_shepherdi	1	2
Eubalaena_glacialis	0.995413	2
Eubalaena_japonica	0.990032	2
Balaenoptera_physalus	1	2
Balaenoptera_musculus	0.996578	2
Balaenoptera_omurai	1	2
Balaenoptera_borealis	1	2
Balaenoptera_edeni	1	2
Mesoplodon_perrini	1	2
Balaenoptera_bonaerensis	1	2
Mesoplodon_peruvianus	1	2
Lissodelphis_peronii	0.881105	2
Lissodelphis_borealis	0.891196	2
Balaena_mysticetus	0.993539	2
Caperea_marginata	0.580433	2
Balaenoptera_acutorostrata	1	2
Mesoplodon_ginkgodens	1	2
Megaptera_novaeangliae	0.990032	2
Eschrichtius_robustus	0.995413	2

## Sheet: Afrotheria_Brillouin_TL
	Brillouin_TL	group
Hydrodamalis_gigas	0.351939	1
Trichechus_manatus	0.270614	1
Trichechus_senegalensis	0.270614	1
Trichechus_inunguis	0.28898	1
Dugong_dugon	0.333615	1
Loxodonta_africana	0.325187	1
Elephas_maximus	0.40444	1
Procavia_capensis	0.526631	1
Heterohyrax_brucei	0.491748	1
Dendrohyrax_validus	0.512289	1
Dendrohyrax_dorsalis	0.533912	1
Dendrohyrax_arboreus	0.491748	1
Orycteropus_afer	0.582065	2
Rhynchocyon_cirnei	0.562915	2
Rhynchocyon_chrysopygus	0.582065	2
Rhynchocyon_petersi	0.582065	2
Elephantulus_myurus	0.562915	2
Elephantulus_edwardii	0.528257	2
Macroscelides_proboscideus	0.528257	2
Petrodromus_tetradactylus	0.562915	2
Elephantulus_rufescens	0.562915	2
Elephantulus_brachyrhynchus	0.528257	2
Elephantulus_intufi	0.562915	2
Elephantulus_rupestris	0.528257	2
Potamogale_velox	0.462664	2
Limnogale_mergulus	0.462664	2
Microgale_talazaci	0.53955	2
Microgale_longicaudata	0.500972	2
Microgale_cowani	0.462664	2
Oryzorictes_tetradactylus	0.462664	2
Tenrec_ecaudatus	0.444056	2
Hemicentetes_semispinosus	0.414143	2
Setifer_setosus	0.53955	2
Echinops_telfairi	0.424285	2
Eremitalpa_granti	0.270614	2
Amblysomus_hottentotus	0.333615	2
Calcochloris_obtusirostris	0.333615	2
Chrysospalax_trevelyani	0.333615	2
Chrysochloris_asiatica	0.333615	2

## Sheet: Afrotheria_evenness_TL
	evenness_TL	group
Hydrodamalis_gigas	0.580433	1
Trichechus_manatus	0.449696	1
Trichechus_senegalensis	0.449696	1
Trichechus_inunguis	0.486467	1
Dugong_dugon	0.545019	1
Loxodonta_africana	0.529802	1
Elephas_maximus	0.660724	1
Procavia_capensis	0.840682	1
Heterohyrax_brucei	0.784998	1
Dendrohyrax_validus	0.813527	1
Dendrohyrax_dorsalis	0.853902	1
Dendrohyrax_arboreus	0.784998	1
Orycteropus_afer	0.956938	2
Rhynchocyon_cirnei	0.928382	2
Rhynchocyon_chrysopygus	0.956938	2
Rhynchocyon_petersi	0.956938	2
Elephantulus_myurus	0.928382	2
Elephantulus_edwardii	0.871223	2
Macroscelides_proboscideus	0.871223	2
Petrodromus_tetradactylus	0.928382	2
Elephantulus_rufescens	0.928382	2
Elephantulus_brachyrhynchus	0.871223	2
Elephantulus_intufi	0.928382	2
Elephantulus_rupestris	0.871223	2
Potamogale_velox	0.755844	2
Limnogale_mergulus	0.755844	2
Microgale_talazaci	0.879048	2
Microgale_longicaudata	0.816195	2
Microgale_cowani	0.755844	2
Oryzorictes_tetradactylus	0.755844	2
Tenrec_ecaudatus	0.719591	2
Hemicentetes_semispinosus	0.680868	2
Setifer_setosus	0.879048	2
Echinops_telfairi	0.699748	2
Eremitalpa_granti	0.449696	2
Amblysomus_hottentotus	0.545019	2
Calcochloris_obtusirostris	0.545019	2
Chrysospalax_trevelyani	0.545019	2
Chrysochloris_asiatica	0.545019	2

## Sheet: Chiroptera_Brillouin_TL
	Brillouin_TL	group
Asellia_tridens	0.575999	1
Cynopterus_brachyotis	0.445898	1
Cynopterus_titthaecheilus	0.492693	1
Eidolon_helvum	0.395496	1
Epomops_franqueti	0.503099	1
Hipposideros_caffer	0.546054	1
Hipposideros_diadema	0.575999	1
Hypsignathus_monstrosus	0.372468	1
Lavia_frons	0.469162	1
Megaderma_spasma	0.457344	1
Pteropus_giganteus	0.503099	1
Pteropus_rufus	0.513551	1
Pteropus_vampyrus	0.503099	1
Rhinolophus_hipposideros	0.546054	1
Rhinopoma_hardwickii	0.469162	1
Rhinopoma_microphyllum	0.546054	1
Rousettus_aegyptiacus	0.503099	1
Anoura_caudifer	0.457344	2
Artibeus_jamaicensis	0.503099	2
Artibeus_planirostris	0.469162	2
Carollia_perspicillata	0.513551	2
Chrotopterus_auritus	0.546054	2
Desmodus_rotundus	0.513551	2
Diaemus_youngi	0.554324	2
Diphylla_ecaudata	0.513551	2
Glossophaga_morenoi	0.513551	2
Glossophaga_soricina	0.513551	2
Lonchophylla_inexpectata	0.469162	2
Lonchorhina_aurita	0.546054	2
Lonchorhina_fernandezi	0.546054	2
Lonchorhina_inusitata	0.546054	2
Lonchorhina_marinkellei	0.546054	2
Lonchorhina_orinocensis	0.546054	2
Macroglossus_minimus	0.457344	2
Macrotus_californicus	0.546054	2
Macrotus_waterhousii	0.546054	2
Micronycteris_microtis	0.503099	2
Mormoops_megalophylla	0.537288	2
Mystacina_tuberculata	0.503099	2
Myzopoda_aurita	0.503099	2
Noctilio_leporinus	0.554324	2
Phylloderma_stenops	0.503099	2
Phyllostomus_discolor	0.546054	2
Pteronotus_parnellii	0.503099	2
Pygoderma_bilabiatum	0.513551	2
Rhinophylla_pumilio	0.481261	2
Sturnira_aratathomasi	0.513551	2
Sturnira_erythromos	0.469162	2
Thyroptera_discifera	0.513551	2
Vampyressa_pusilla	0.457344	2
Vampyrum_spectrum	0.546054	2
Antrozous_pallidus	0.523879	3
Balantiopteryx_plicata	0.569869	3
Barbastella_barbastellus	0.523879	3
Chalinolobus_tuberculatus	0.523879	3
Cynomops_planirostris	0.503099	3
Eptesicus_diminutus	0.523879	3
Eptesicus_nilssonii	0.523879	3
Eptesicus_serotinus	0.523879	3
Euderma_maculatum	0.523879	3
Eumops_perotis	0.537288	3
Histiotus_magellanicus	0.469162	3
Histiotus_montanus	0.523879	3
Lasionycteris_noctivagans	0.523879	3
Lasiurus_cinereus	0.523879	3
Lasiurus_ega	0.523879	3
Miniopterus_schreibersii	0.513551	3
Molossops_temminckii	0.537288	3
Molossus_currentium	0.554324	3
Molossus_molossus	0.554324	3
Myotis_chiloensis	0.523879	3
Myotis_daubentonii	0.523879	3
Myotis_evotis	0.523879	3
Myotis_keaysi	0.523879	3
Myotis_lucifugus	0.481261	3
Myotis_velifer	0.523879	3
Neoromicia_nana	0.523879	3
Nyctalus_noctula	0.523879	3
Nycteris_javanica	0.513551	3
Nycteris_thebaica	0.481261	3
Nyctinomops_macrotis	0.537288	3
Otonycteris_hemprichii	0.554324	3
Peropteryx_leucoptera	0.537288	3
Pipistrellus_pipistrellus	0.469162	3
Plecotus_auritus	0.523879	3
Promops_nasutus	0.537288	3
Saccopteryx_bilineata	0.546054	3
Tadarida_brasiliensis	0.537288	3
Vespertilio_murinus	0.569869	3

## Sheet: Chiroptera_evenness_TL
	evenness_TL	group
Asellia_tridens	0.960728	1
Cynopterus_brachyotis	0.743729	1
Cynopterus_titthaecheilus	0.818739	1
Eidolon_helvum	0.668728	1
Epomops_franqueti	0.839137	1
Hipposideros_caffer	0.910783	1
Hipposideros_diadema	0.960728	1
Hypsignathus_monstrosus	0.621251	1
Lavia_frons	0.793286	1
Megaderma_spasma	0.769891	1
Pteropus_giganteus	0.839137	1
Pteropus_rufus	0.864509	1
Pteropus_vampyrus	0.839137	1
Rhinolophus_hipposideros	0.910783	1
Rhinopoma_hardwickii	0.793286	1
Rhinopoma_microphyllum	0.910783	1
Rousettus_aegyptiacus	0.839137	1
Anoura_caudifer	0.769891	2
Artibeus_jamaicensis	0.839137	2
Artibeus_planirostris	0.793286	2
Carollia_perspicillata	0.864509	2
Chrotopterus_auritus	0.910783	2
Desmodus_rotundus	0.864509	2
Diaemus_youngi	0.933147	2
Diphylla_ecaudata	0.864509	2
Glossophaga_morenoi	0.864509	2
Glossophaga_soricina	0.864509	2
Lonchophylla_inexpectata	0.793286	2
Lonchorhina_aurita	0.910783	2
Lonchorhina_fernandezi	0.910783	2
Lonchorhina_inusitata	0.910783	2
Lonchorhina_marinkellei	0.910783	2
Lonchorhina_orinocensis	0.910783	2
Macroglossus_minimus	0.769891	2
Macrotus_californicus	0.910783	2
Macrotus_waterhousii	0.910783	2
Micronycteris_microtis	0.839137	2
Mormoops_megalophylla	0.892845	2
Mystacina_tuberculata	0.839137	2
Myzopoda_aurita	0.839137	2
Noctilio_leporinus	0.933147	2
Phylloderma_stenops	0.839137	2
Phyllostomus_discolor	0.910783	2
Pteronotus_parnellii	0.839137	2
Pygoderma_bilabiatum	0.864509	2
Rhinophylla_pumilio	0.823183	2
Sturnira_aratathomasi	0.864509	2
Sturnira_erythromos	0.793286	2
Thyroptera_discifera	0.864509	2
Vampyressa_pusilla	0.769891	2
Vampyrum_spectrum	0.910783	2
Antrozous_pallidus	0.885804	3
Balantiopteryx_plicata	0.946987	3
Barbastella_barbastellus	0.885804	3
Chalinolobus_tuberculatus	0.885804	3
Cynomops_planirostris	0.839137	3
Eptesicus_diminutus	0.885804	3
Eptesicus_nilssonii	0.885804	3
Eptesicus_serotinus	0.885804	3
Euderma_maculatum	0.885804	3
Eumops_perotis	0.892845	3
Histiotus_magellanicus	0.793286	3
Histiotus_montanus	0.885804	3
Lasionycteris_noctivagans	0.885804	3
Lasiurus_cinereus	0.885804	3
Lasiurus_ega	0.885804	3
Miniopterus_schreibersii	0.864509	3
Molossops_temminckii	0.892845	3
Molossus_currentium	0.933147	3
Molossus_molossus	0.933147	3
Myotis_chiloensis	0.885804	3
Myotis_daubentonii	0.885804	3
Myotis_evotis	0.885804	3
Myotis_keaysi	0.885804	3
Myotis_lucifugus	0.823183	3
Myotis_velifer	0.885804	3
Neoromicia_nana	0.885804	3
Nyctalus_noctula	0.885804	3
Nycteris_javanica	0.864509	3
Nycteris_thebaica	0.823183	3
Nyctinomops_macrotis	0.892845	3
Otonycteris_hemprichii	0.933147	3
Peropteryx_leucoptera	0.892845	3
Pipistrellus_pipistrellus	0.793286	3
Plecotus_auritus	0.885804	3
Promops_nasutus	0.892845	3
Saccopteryx_bilineata	0.910783	3
Tadarida_brasiliensis	0.892845	3
Vespertilio_murinus	0.946987	3
